# Supplementary material for: A Modified 1H-NMR Quantification Method of Ephedrine Alkaloids in Ephedrae Herba Samples
Source: MDPI journal article supplement (doi:10.3390/ijms241411272), 2023-07-10
Supplement: s1 [file s1]

## Supplementary Materials

# A Modified $^1\text{H}$ -NMR Quantification Method of Ephedrine Alkaloids in Ephedrae Herba Samples

Yue-Chiun Li <sup>1,†</sup>, Chia-Hung Wu <sup>2,†</sup>, Thi Ha Le <sup>1</sup>, Qingjun Yuan <sup>3</sup>, Luqi Huang <sup>3</sup>, Guo-Fen Chen <sup>4</sup>, Mei-Lin Yang <sup>1</sup>, Sio-Hong Lam <sup>1</sup>, Hsin-Yi Hung <sup>1</sup>, Handong Sun <sup>5</sup>, Yi-Hung Wu <sup>6</sup>, Ping-Chung Kuo <sup>1,\*</sup> and Tian-Shung Wu <sup>1,\*</sup>

<sup>1</sup> School of Pharmacy, College of Medicine, National Cheng Kung University, Tainan 701, Taiwan; ycli0126@gmail.com (Y.-C.L.); lethiha.hup@gmail.com (T.H.L.); l3891104@nckualumni.org.tw (M.-L.Y.); shlam@mail.ncku.edu.tw (S.-H.L.); z10308005@email.ncku.edu.tw (H.-Y.H.)

<sup>2</sup> School of Post-Baccalaureate Chinese Medicine, China Medical University, Taichung 404, Taiwan; 108030049@365.cmu.edu.tw

<sup>3</sup> State Key Laboratory Breeding Base of Dao-di Herbs, National Resource Center for Chinese Materia Medica, China Academy of Chinese Medical Sciences, Beijing 100010, China; yuanqingjun@icmm.ac.cn (Q.Y.); huangluqi01@126.com (L.H.)

<sup>4</sup> Department of Chemistry, National Chung-Hsing University, Taichung 402, Taiwan; edward.chen@jeolanalytical.com.tw

<sup>5</sup> Kunming Institute of Botany, Chinese Academy of Sciences, Kunming 650201, China; hdsun@mail.kib.ac.cn

<sup>6</sup> Hsinhua Forest Station, The Experimental Forest Management Office, National Chung-Hsing University, Taichung 402, Taiwan; yihung@dragon.nchu.edu.tw

\* Correspondence: z10502016@ncku.edu.tw (P.-C.K.); tswu@mail.ncku.edu.tw (T.-S.W.); Tel.: +886-6-2353535 (ext. 6806) (P.-C.K.); +886-6-2757575 (ext. 65333) (T.-S.W.)

† These authors contributed equally to this work.

## Contents

- Figure S1. The  $^1\text{H}$ -NMR spectra of ephedrine alkaloids extract of EP01, EP02, and EP03.
- Figure S2. Ephedrine alkaloids and their cyclization products in EP01, EP02, and EP03.
- Figure S3. ESI-TOF-MS of compound **7**.
- Figure S4.  $^1\text{H}$ -NMR of compound **7**.
- Figure S5. Characteristic carbon signals of compound **7**.
- Figure S6. HMBC of compound **7**.
- Figure S7. ESI-TOF-MS of compound **8**.
- Figure S8.  $^1\text{H}$ -NMR of compound **8**.
- Figure S9. Characteristic carbon signals of compound **8**.
- Figure S10. HMBC of compound **8**.
- Figure S11.  $^1\text{H}$ -NMR of compound **9**.
- Figure S12. Characteristic carbon signals of compound **9**.
- Figure S13. HMBC of compound **9**.
- Figure S14. The ephedrine alkaloids chloroform extracts of *E. sinica* (EP01).
- Figure S15. The ephedrine alkaloids benzene extracts of *E. sinica* (EP04).
- Figure S16.  $^1\text{H}$ -NMR of ME (**1**).
- Figure S17. HSQC/TOCSY (—), HSQC (.....) and HMBC (— —) spectra of ME (**1**).
- Figure S18.  $^1\text{H}$ -NMR of EP (**2**).
- Figure S19. HSQC/TOCSY (—), HSQC (.....) and HMBC(— —) spectra of EP (**2**).
- Figure S20.  $^1\text{H}$ -NMR of NP (**4**).
- Figure S21. HSQC/TOCSY (—) spectra of NP (**4**).
- Figure S22.  $^1\text{H}$ -NMR of PE (**6**).
- Figure S23. HSQC/TOCSY (—), HSQC (.....) and HMBC(— —) spectra of PE (**6**).
- Figure S24.  $^1\text{H}$ -NMR of EP01.
- Figure S25.  $^1\text{H}$ -NMR of EP02.
- Figure S26.  $^1\text{H}$ -NMR of EP03.
- Figure S27.  $^1\text{H}$ -NMR of EP04.
- Figure S28.  $^1\text{H}$ -NMR of EP05.
- Figure S29.  $^1\text{H}$ -NMR of EP06.
- Figure S30.  $^1\text{H}$ -NMR of EP07.
- Figure S31.  $^1\text{H}$ -NMR of EP08.

Figure S32.  $^1\text{H}$ -NMR of EP09.

Figure S33.  $^1\text{H}$ -NMR of EP10.

Figure S34.  $^1\text{H}$ -NMR of EP11.

Figure S35.  $^1\text{H}$ -NMR of EP12.

Figure S36.  $^1\text{H}$ -NMR of EP13.

Figure S37.  $^1\text{H}$ -NMR of EP14.

Figure S38.  $^1\text{H}$ -NMR of EP15.

Figure S39.  $^1\text{H}$ -NMR of EP16.

Figure S40.  $^1\text{H}$ -NMR of EP17.

Figure S41.  $^1\text{H}$ -NMR of EP18.

Figure S42.  $^1\text{H}$ -NMR of EP19.

Figure S43.  $^1\text{H}$ -NMR of EP20.

Table S1. Extraction and preparation of Ephedrae Herba for NMR analysis.

Figure S1. The  $^1\text{H}$ -NMR spectra of ephedrine alkaloids extract of EP01, EP02, and EP03.

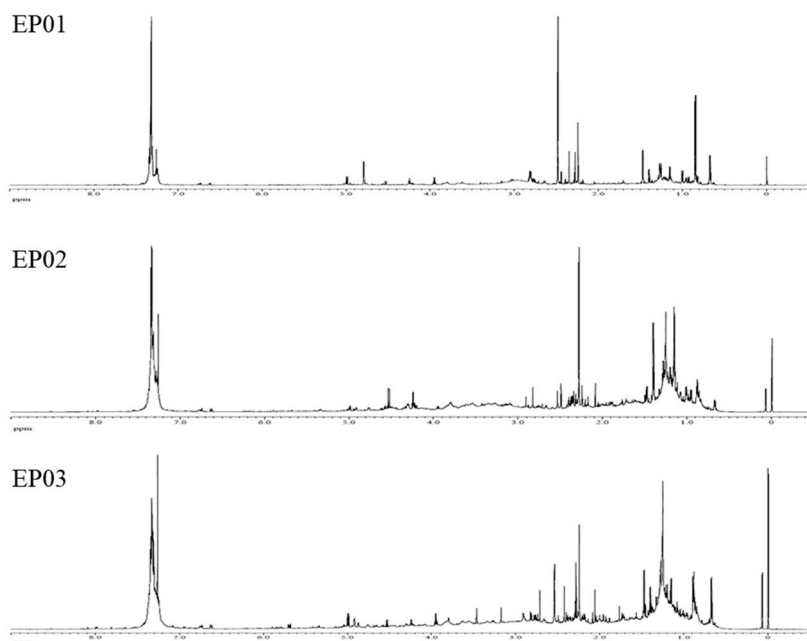

Figure S2. Ephedrine alkaloids and their cyclization products in EP01, EP02, and EP03.

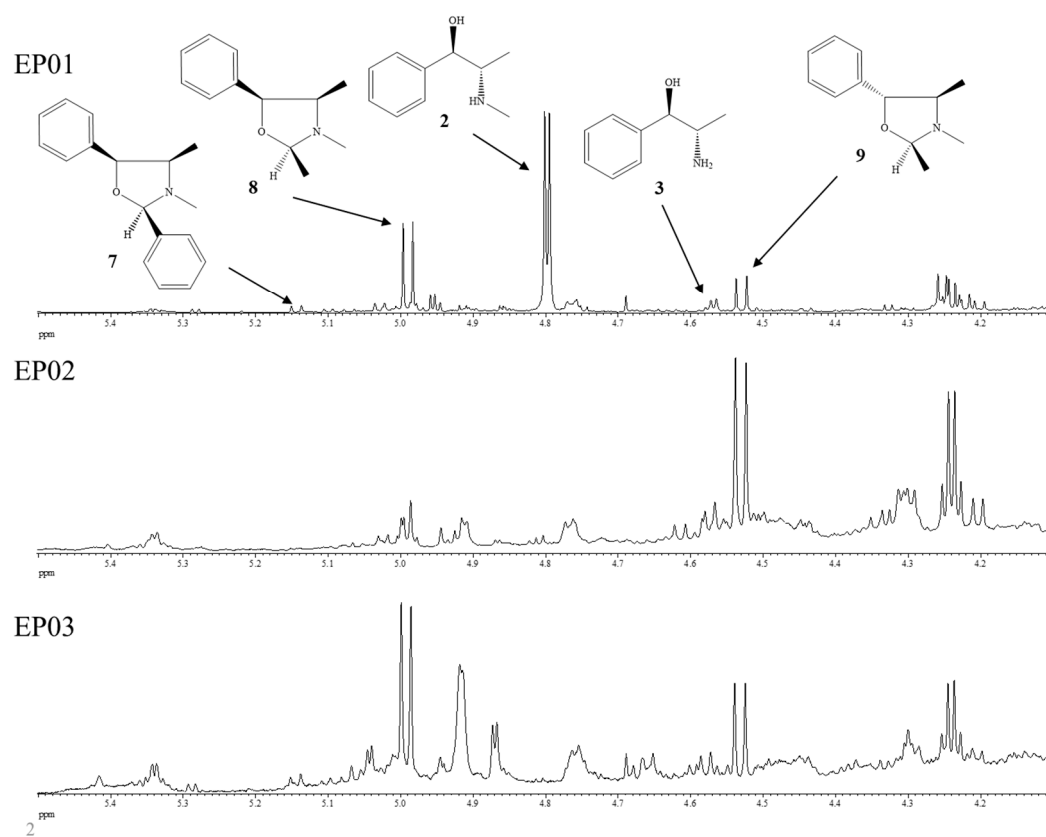

Figure S3. ESI-TOF-MS of compound 7.

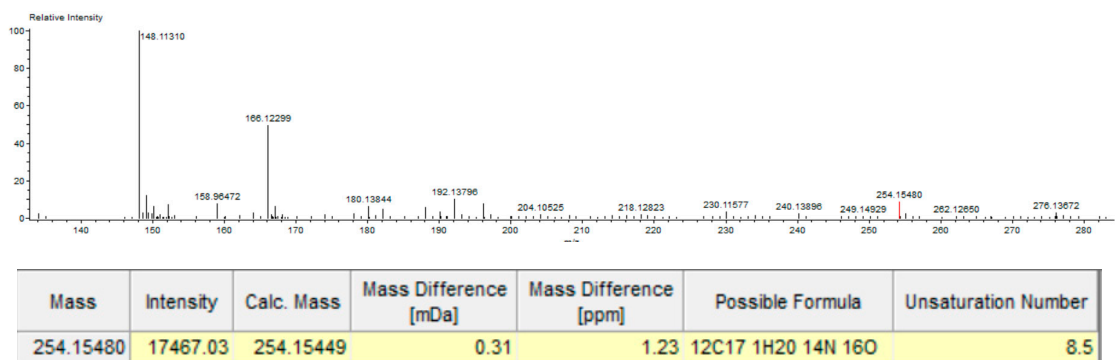

Figure S4.  $^1\text{H}$ -NMR of compound 7.

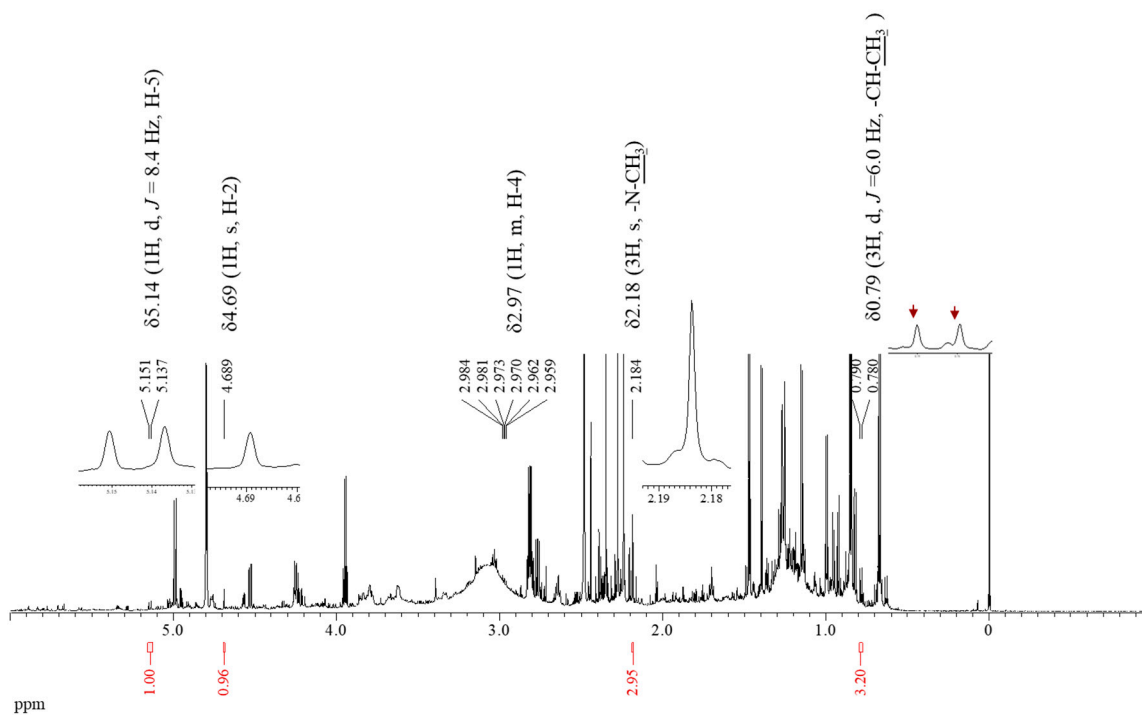

Figure S5. Characteritic carbon signals of compound 7.

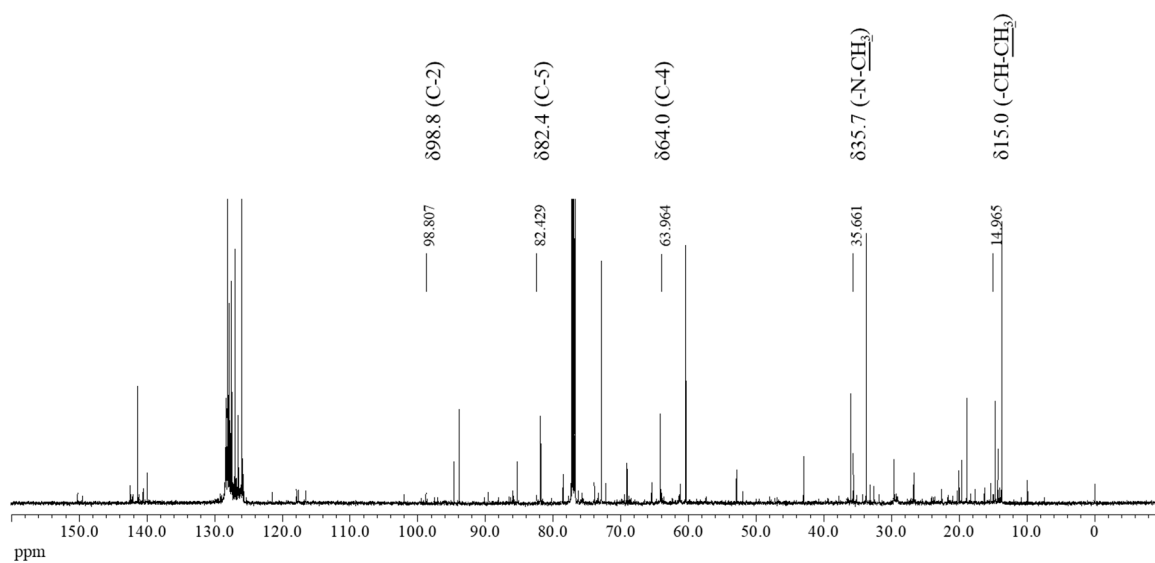

Figure S6. HMBC of compound 7.

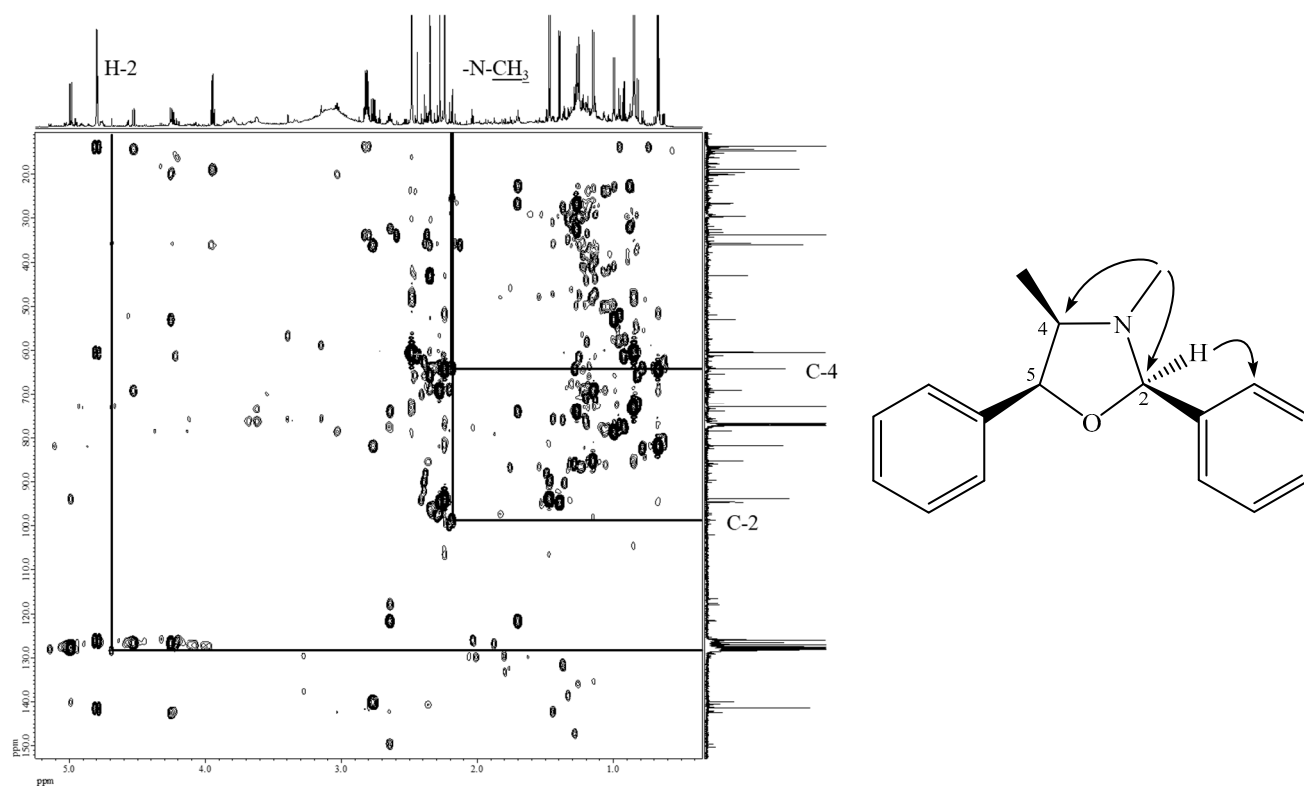

Figure S7. ESI-TOF-MS of compound **8**.

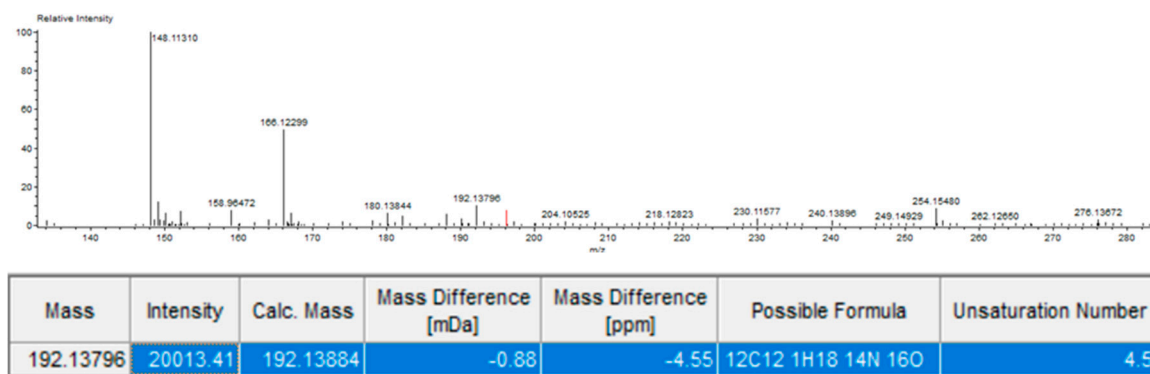

Figure S8.  $^1\text{H}$ -NMR of compound **8**.

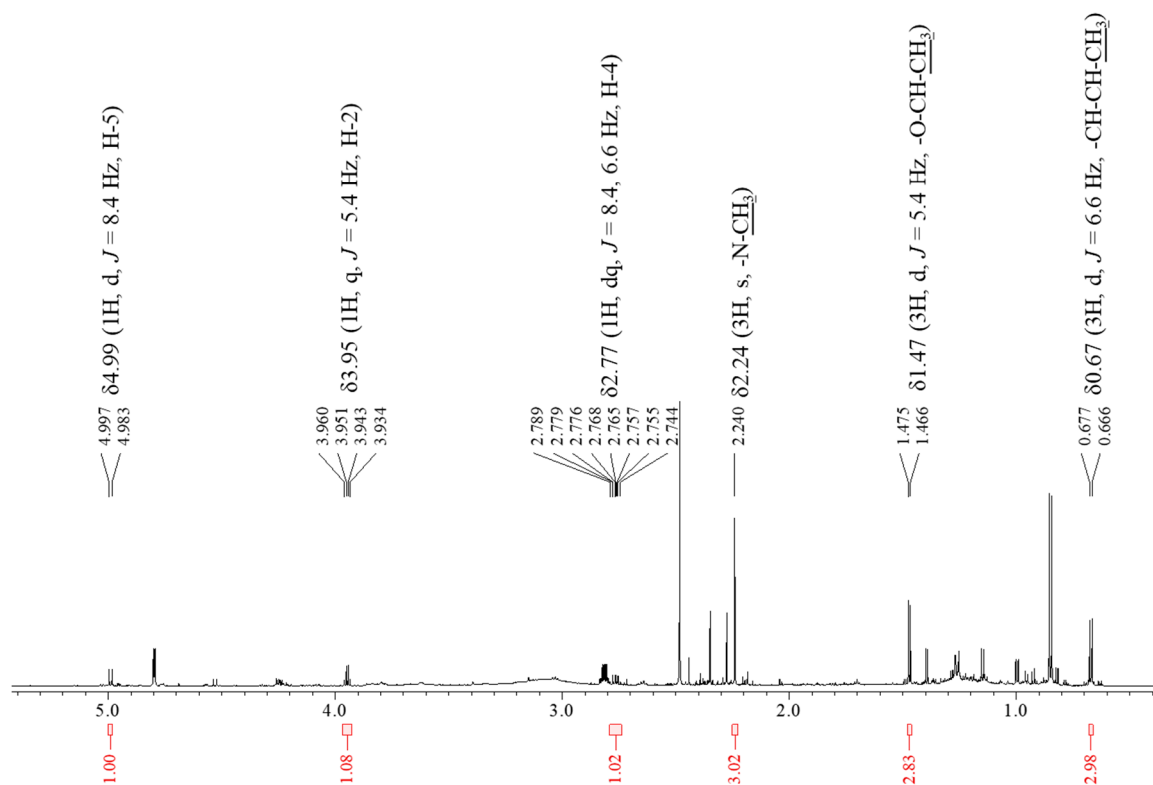

Figure S9. Characteritic carbon signals of compound **8**.

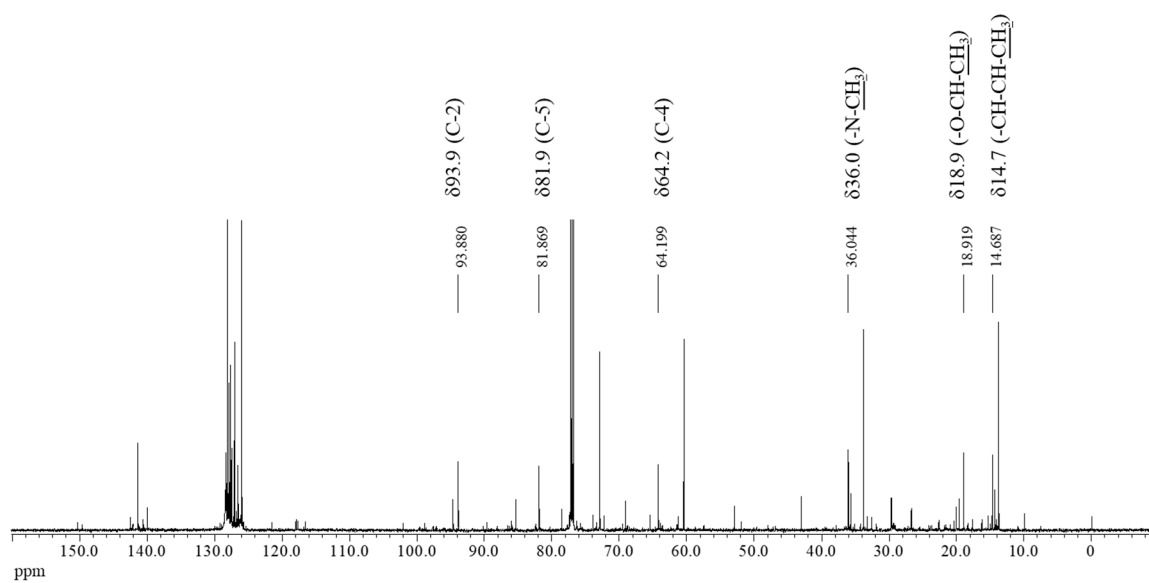

Figure S10. HMBC of compound **8**.

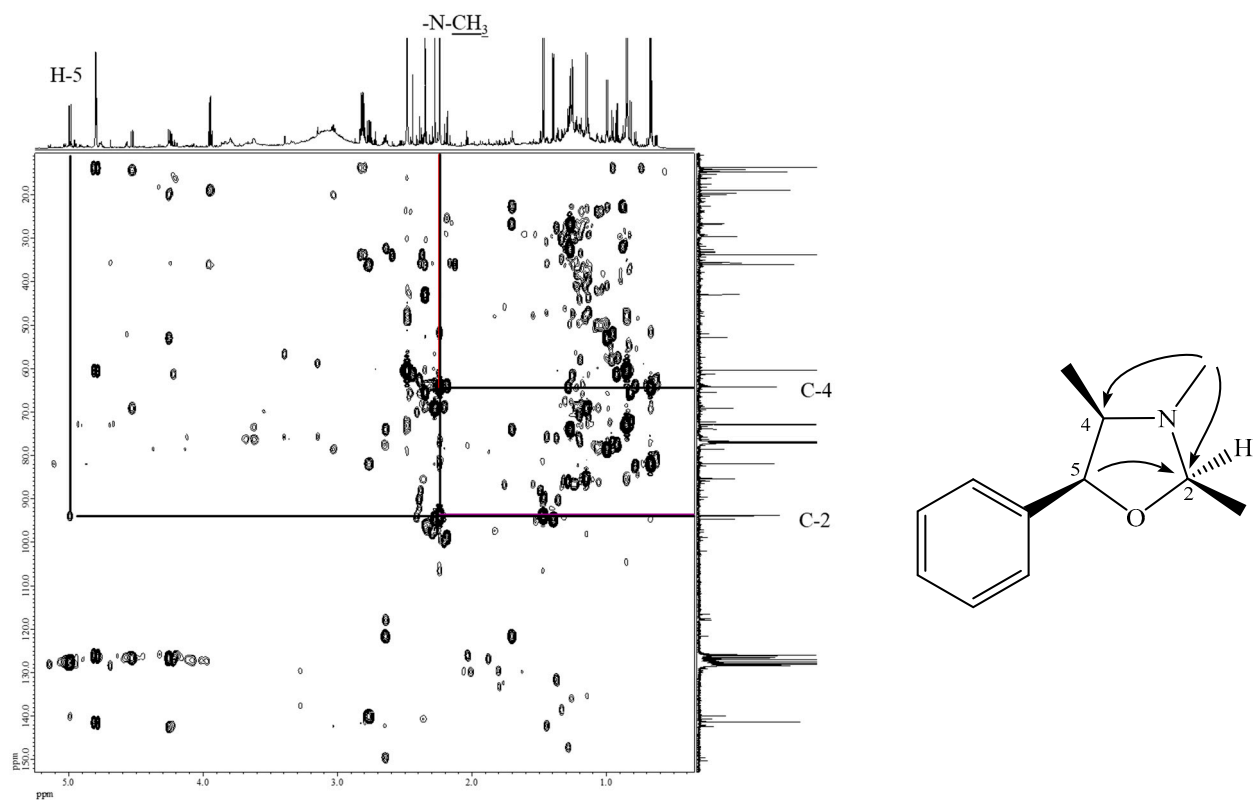



Figure S11.  $^1\text{H}$ -NMR of compound **9**.

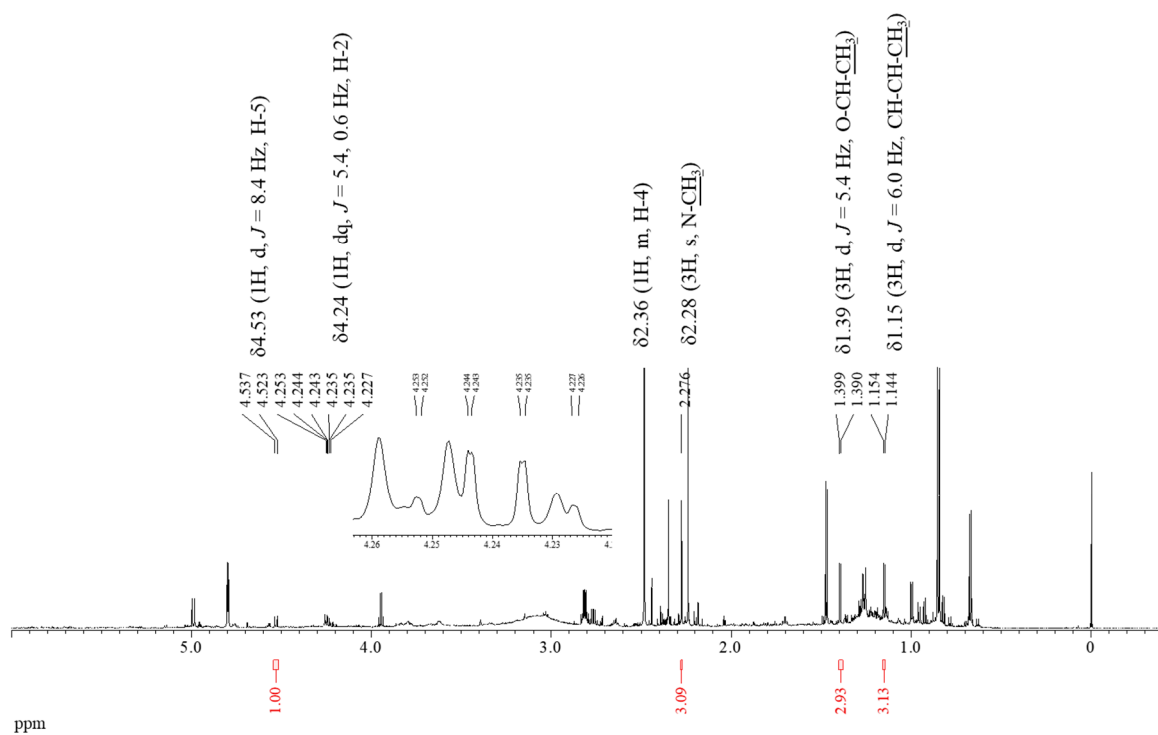

Figure S12. Characteristic carbon signals of compound **9**.

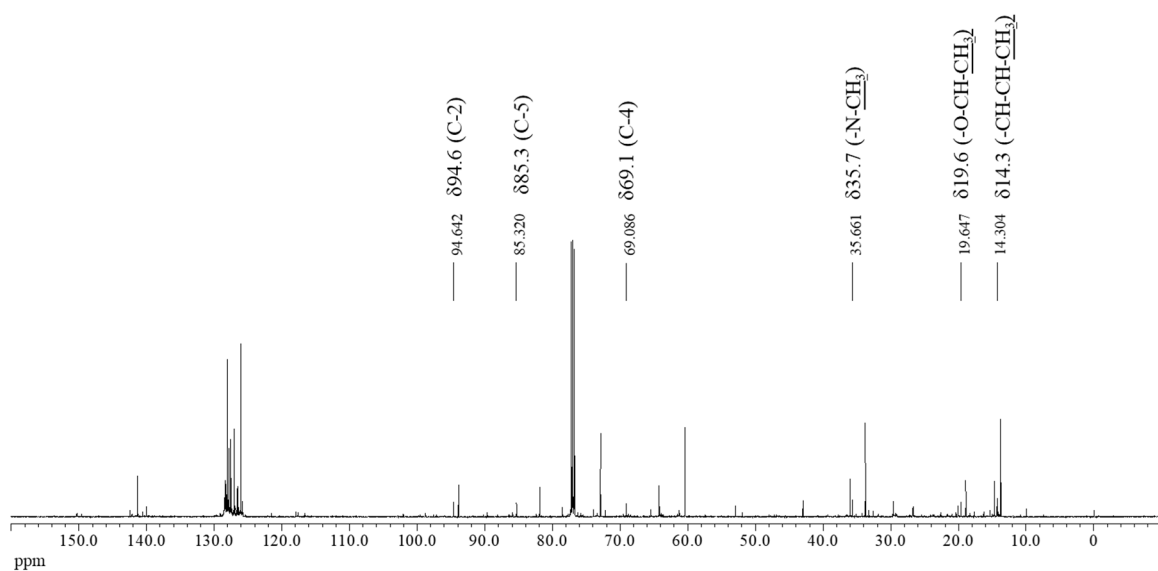

Figure S13. HMBC of compound **9**.

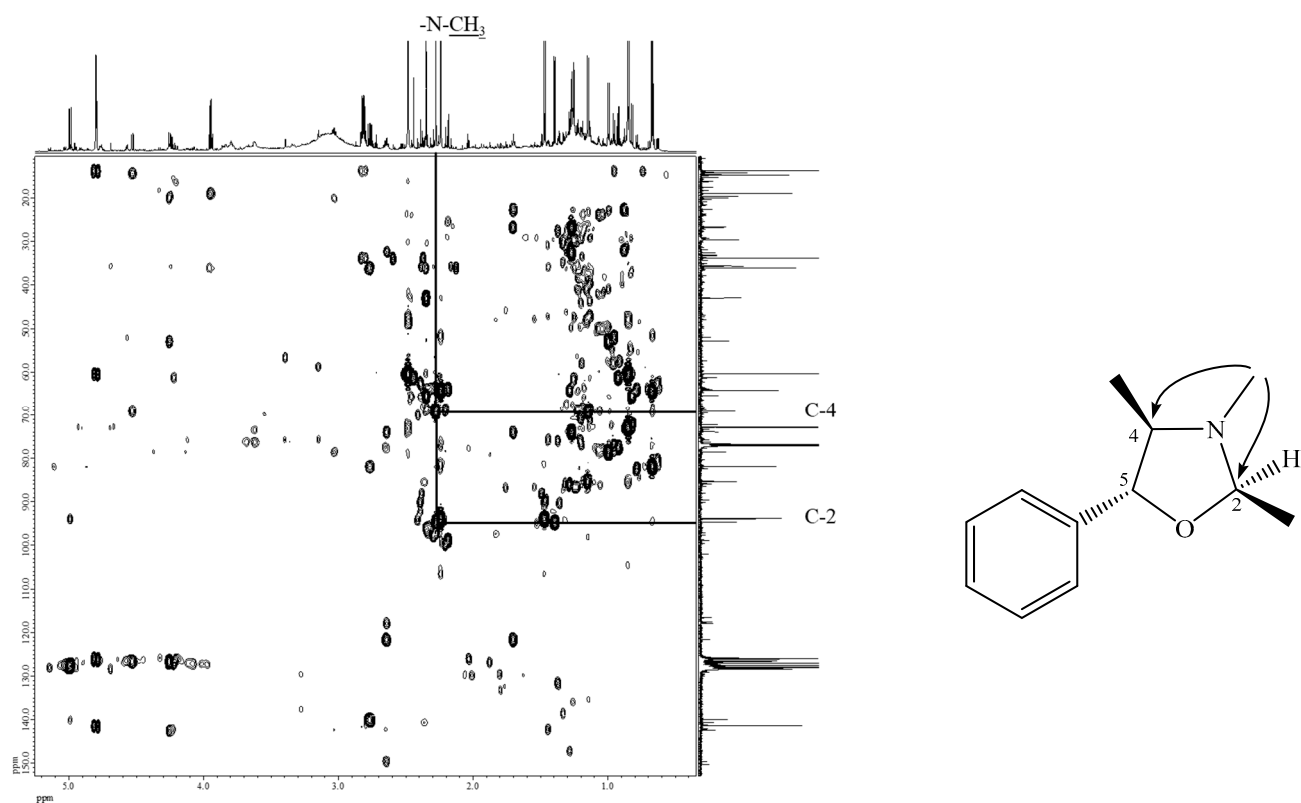

Figure S14. The ephedrine alkaloids chloroform extracts of *E. sinica* (EP01).

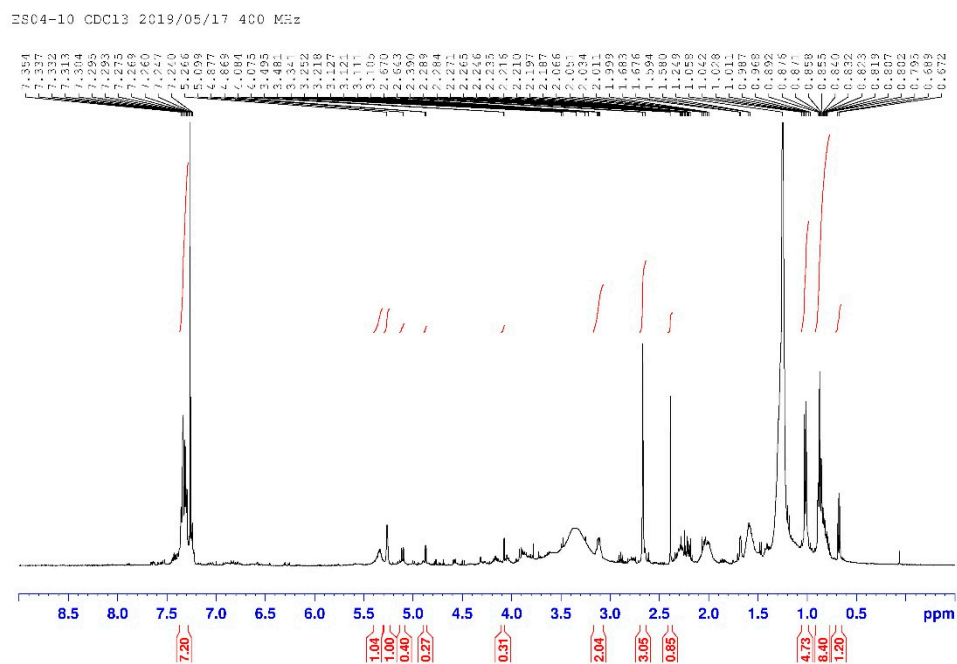

Figure S15. The ephedrine alkaloids benzene extracts of *E. sinica* (EP04).

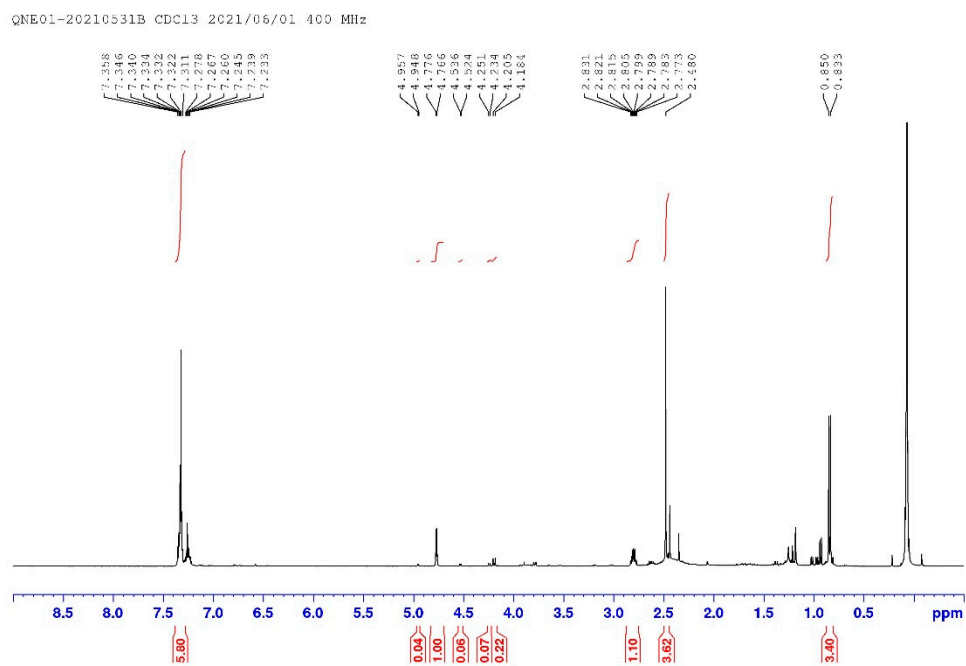

Figure S16.  $^1\text{H}$ -NMR of ME (1).

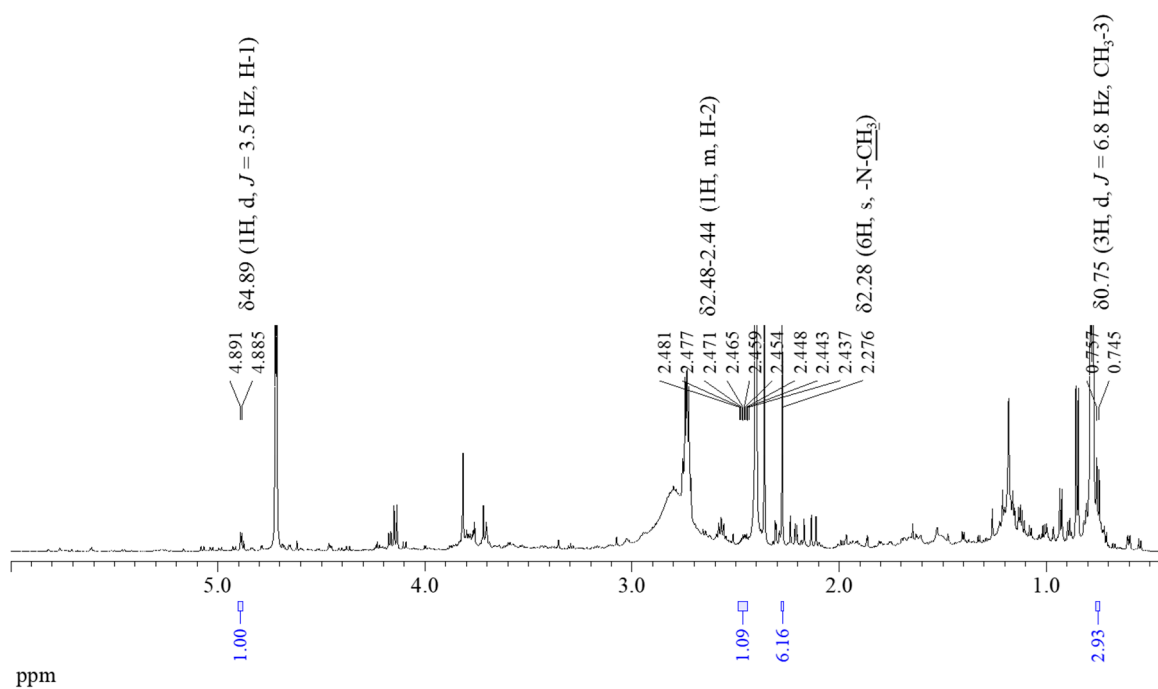

Figure S17. HSQC/TOCSY (—), HSQC (.....) and HMBC (— —) spectra of ME (1).

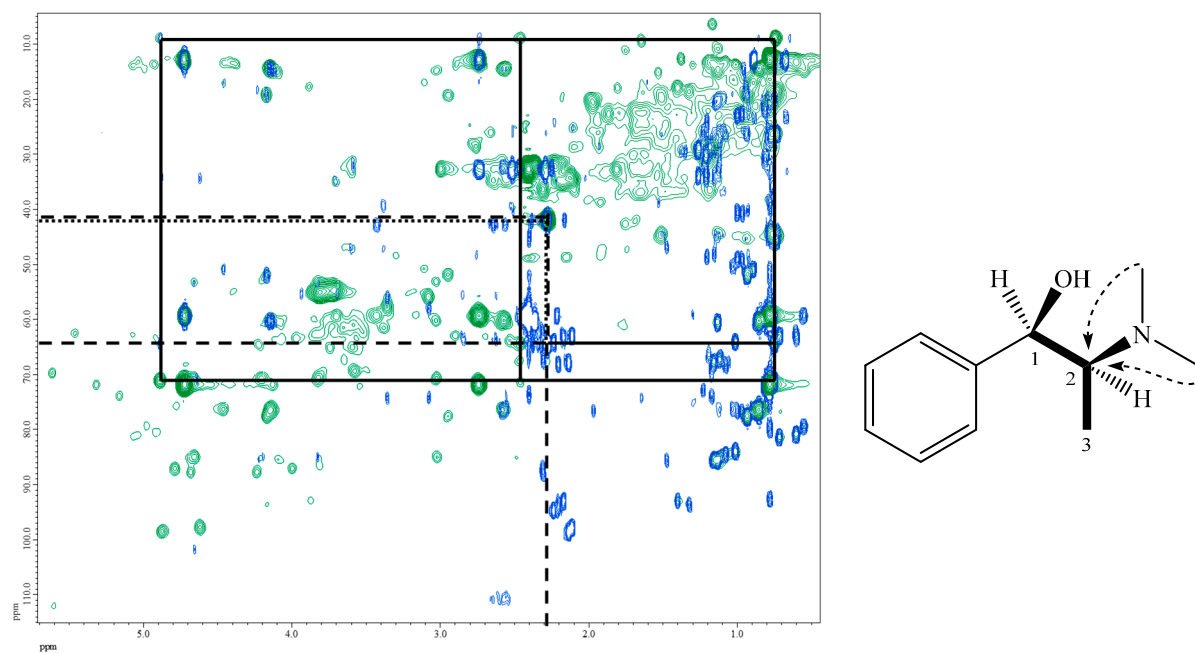

Figure S18.  $^1\text{H}$ -NMR of EP (2).

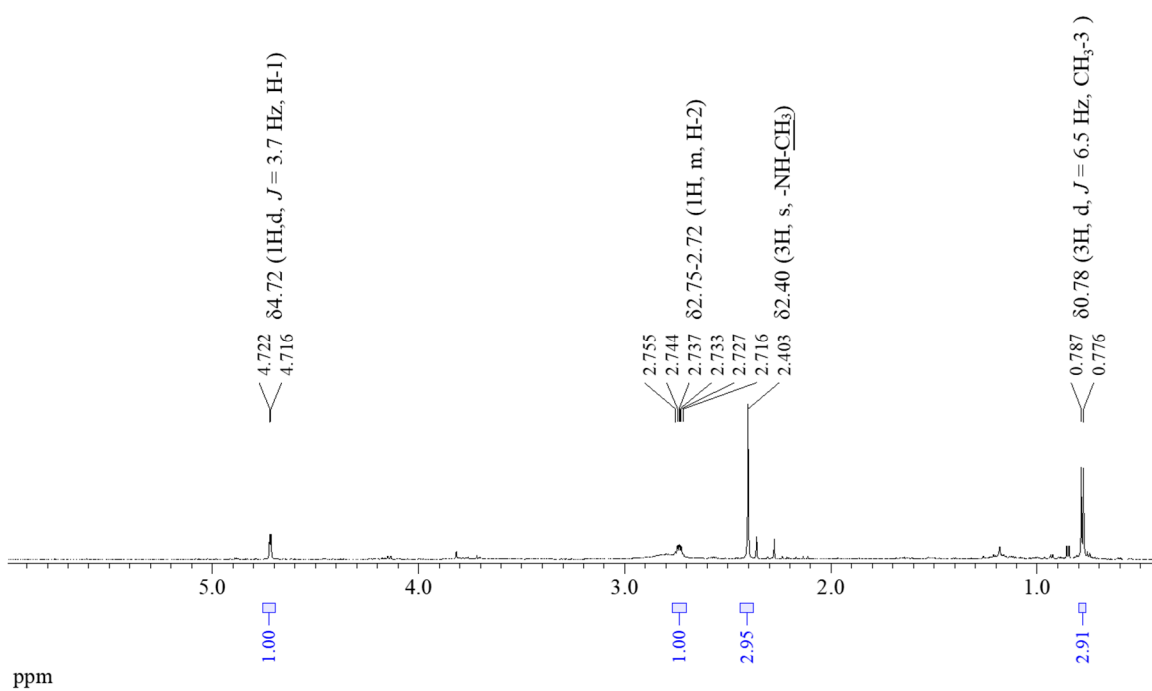

Figure S19. HSQC/TOCSY (—), HSQC (.....) and HMBC(— —) spectra of EP (2).

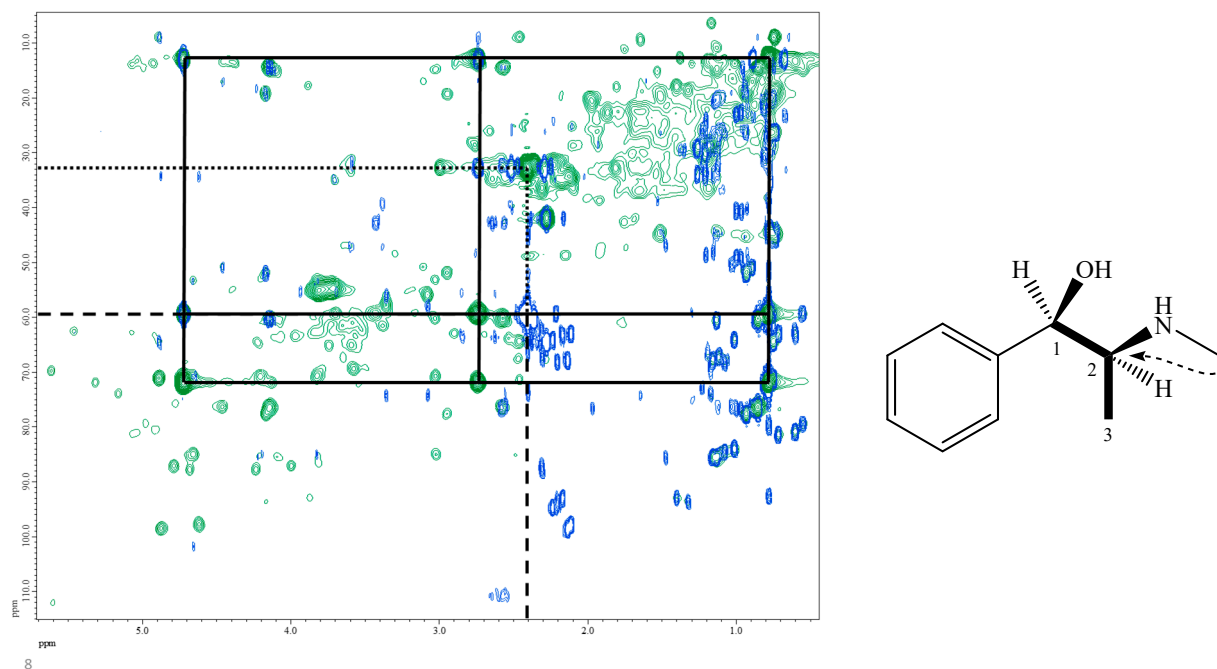

Figure S20.  $^1\text{H}$ -NMR of NP (4).

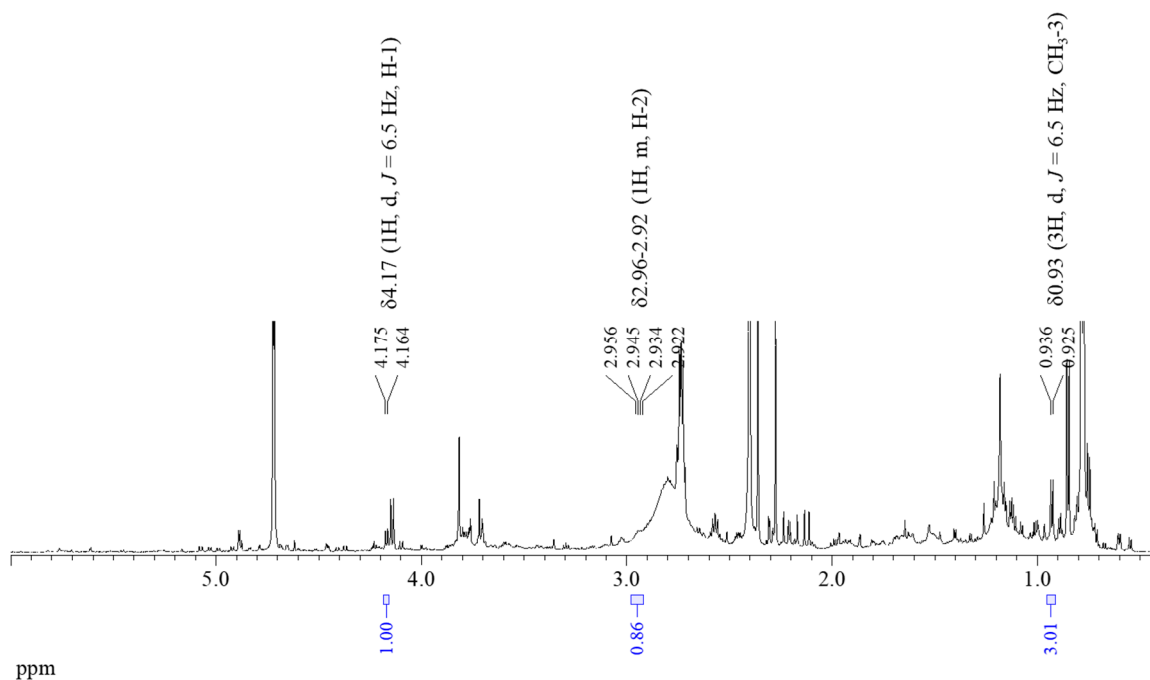

Figure S21. HSQC/TOCSY (—) spectra of NP (4).

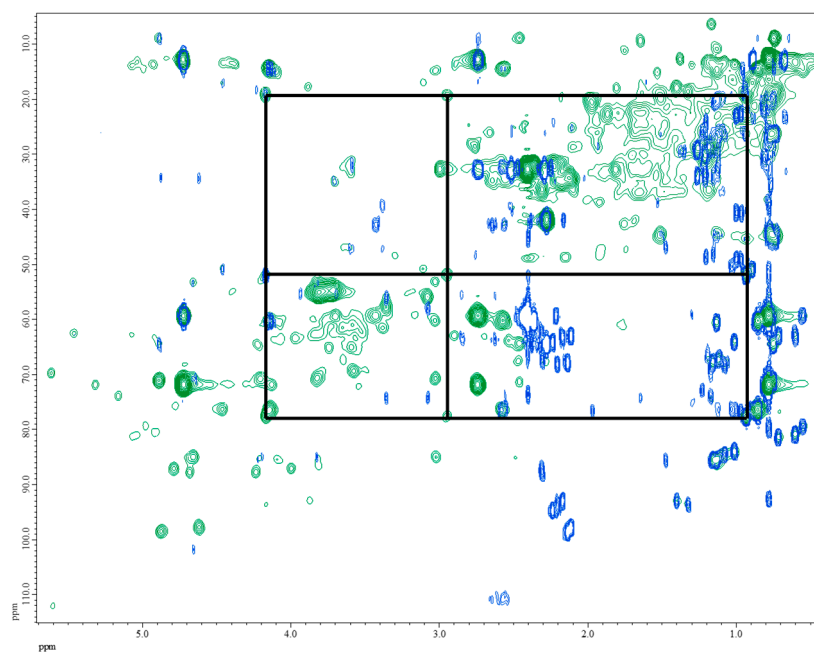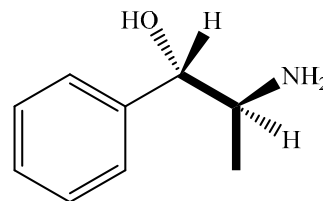

Figure S22.  $^1\text{H}$ -NMR of PE (6).

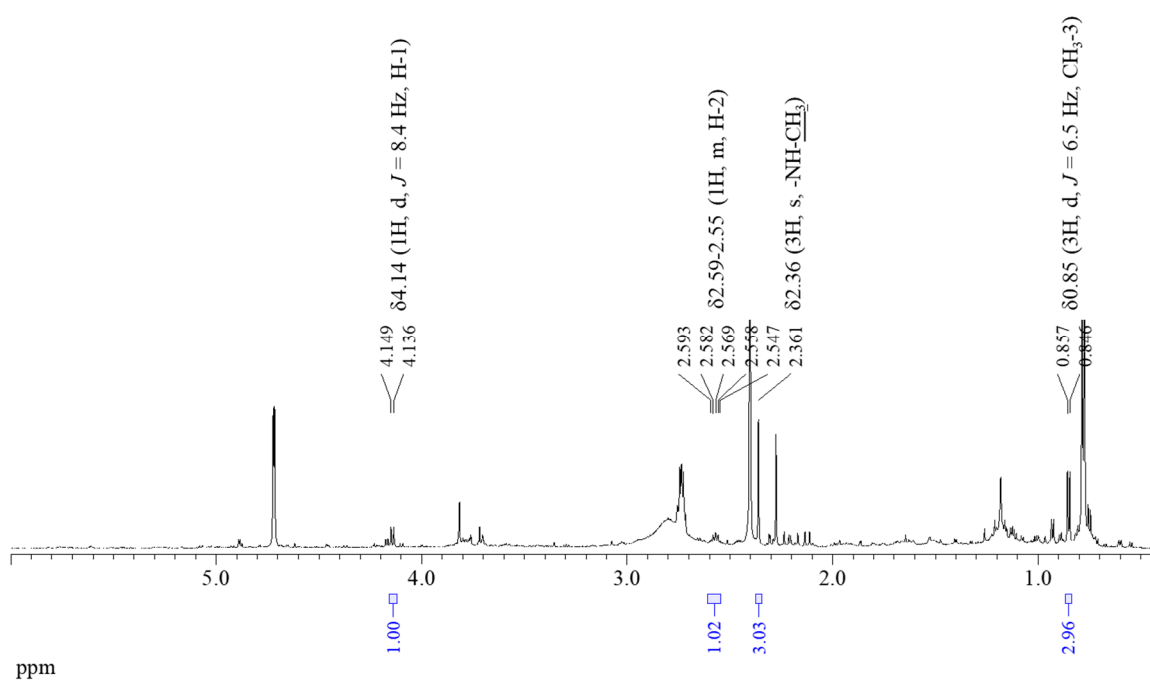

Figure S23. HSQC/TOCSY (—), HSQC (.....) and HMBC( - - ) spectra of PE (6).

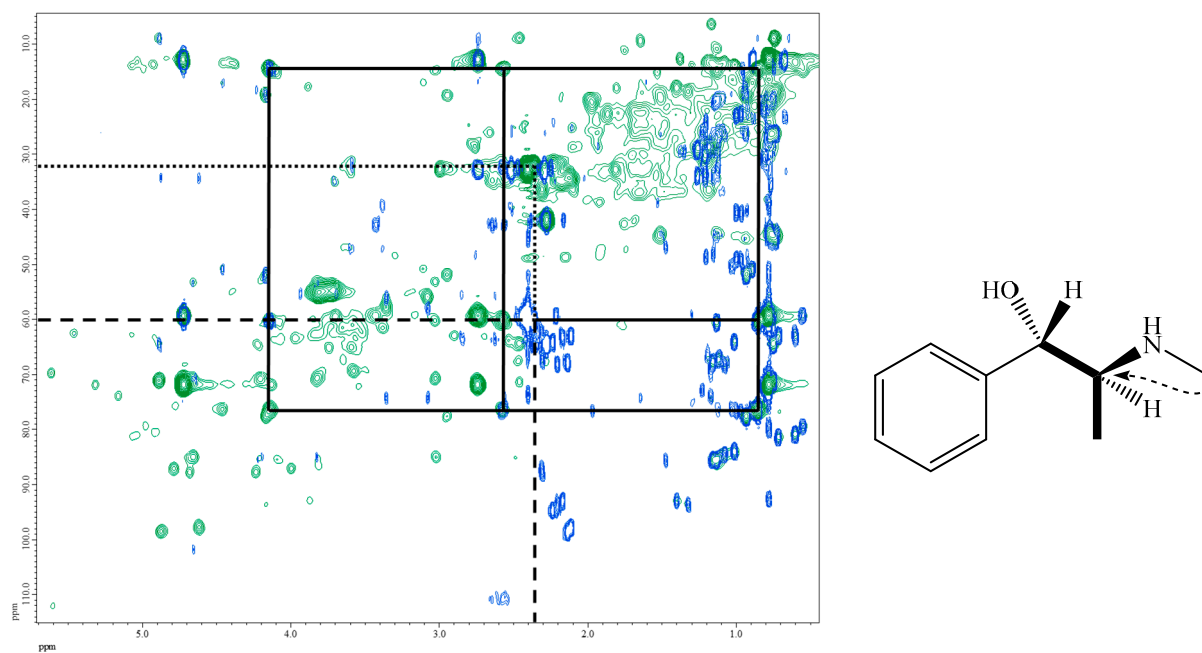

Figure S24.  $^1\text{H}$ -NMR of EP01.

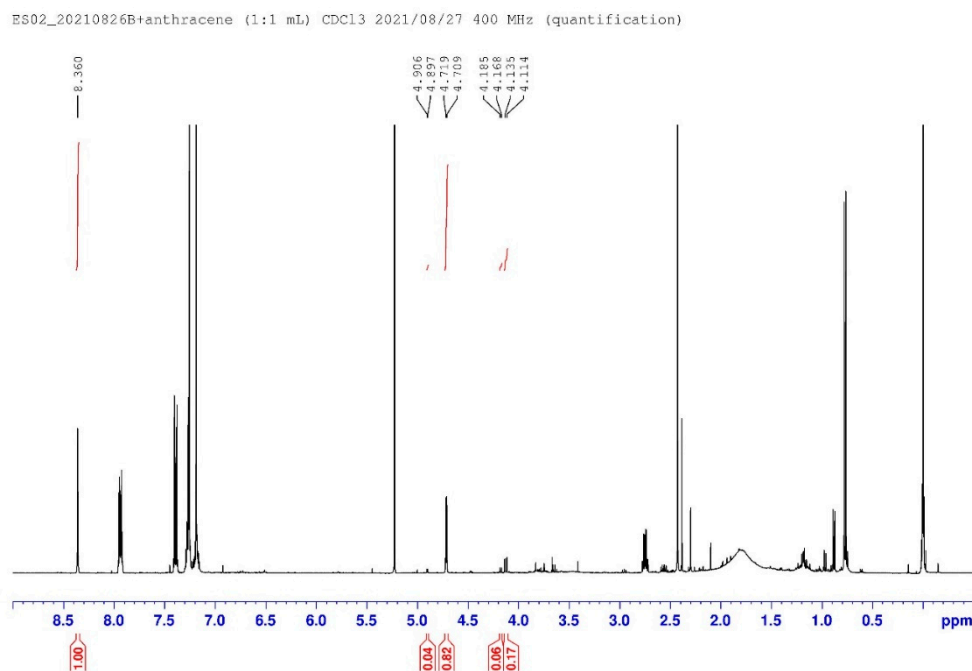

Figure S25.  $^1\text{H}$ -NMR of EP02.

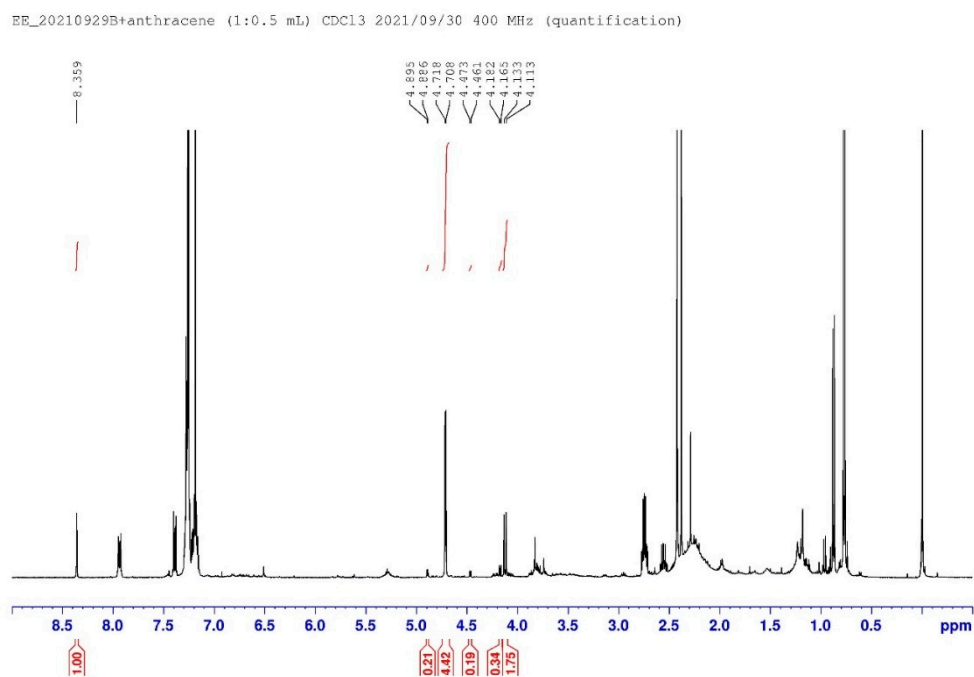

Figure S26.  $^1\text{H}$ -NMR of EP03.

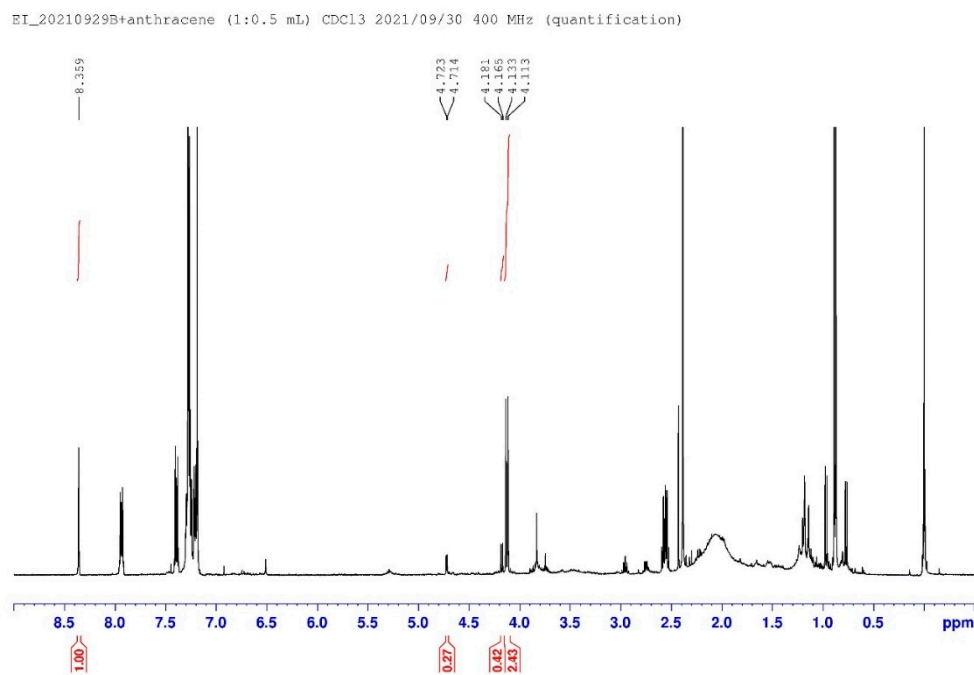



Figure S27.  $^1\text{H}$ -NMR of EP04.

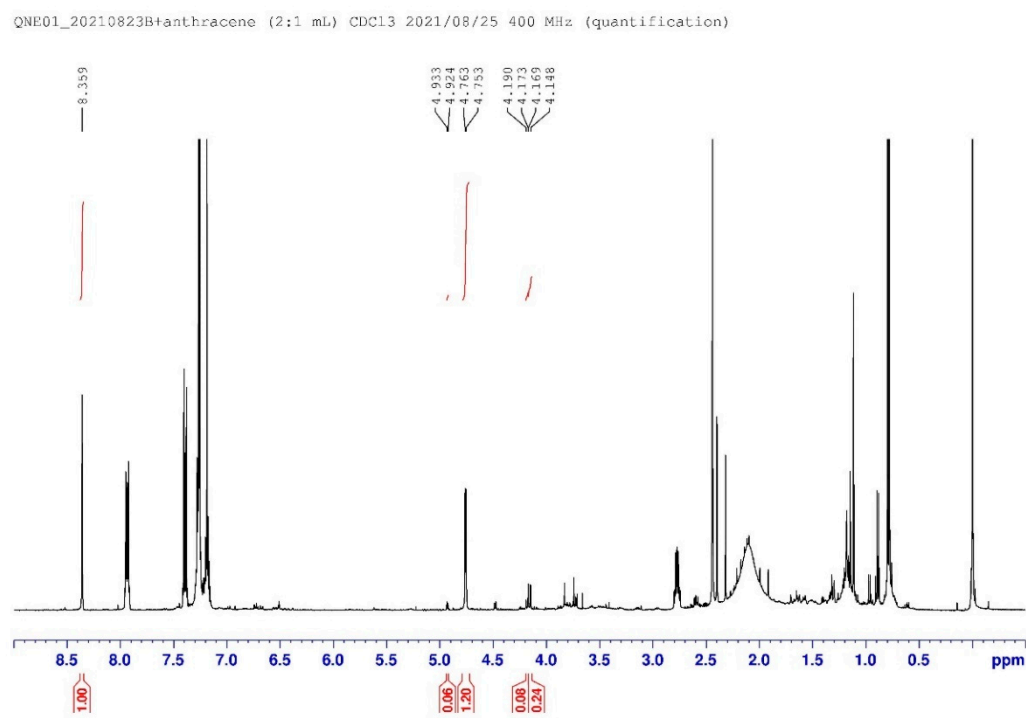

Figure S28.  $^1\text{H}$ -NMR of EP05.

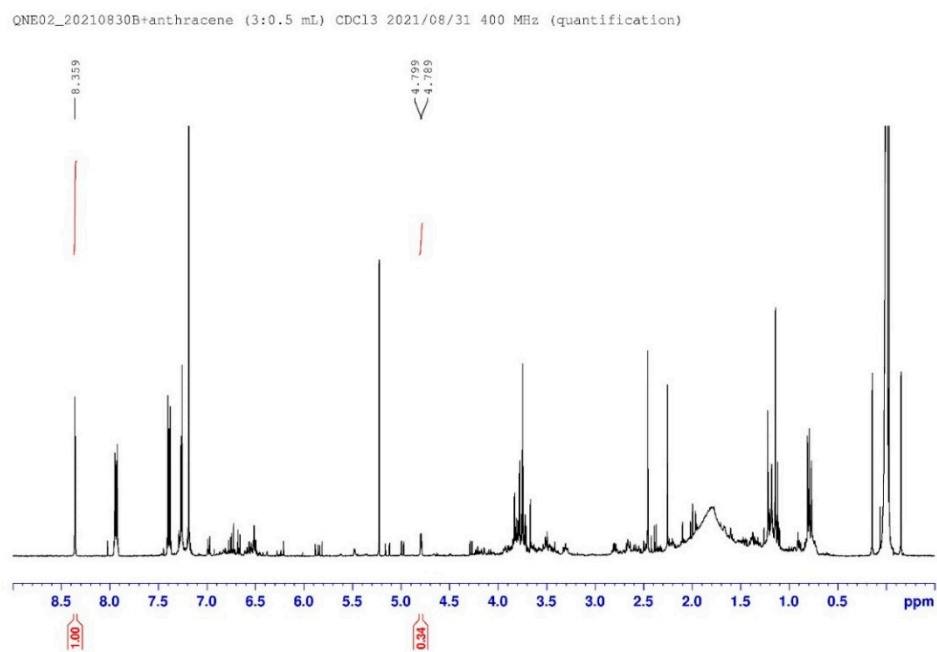

Figure S29.  $^1\text{H}$ -NMR of EP06.

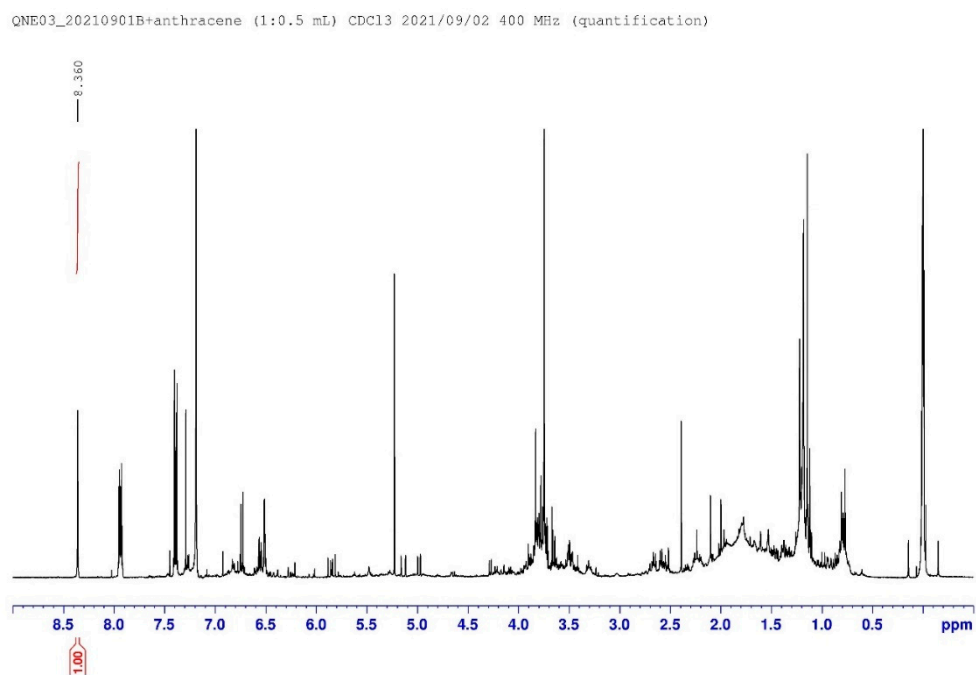

Figure S30.  $^1\text{H}$ -NMR of EP07.

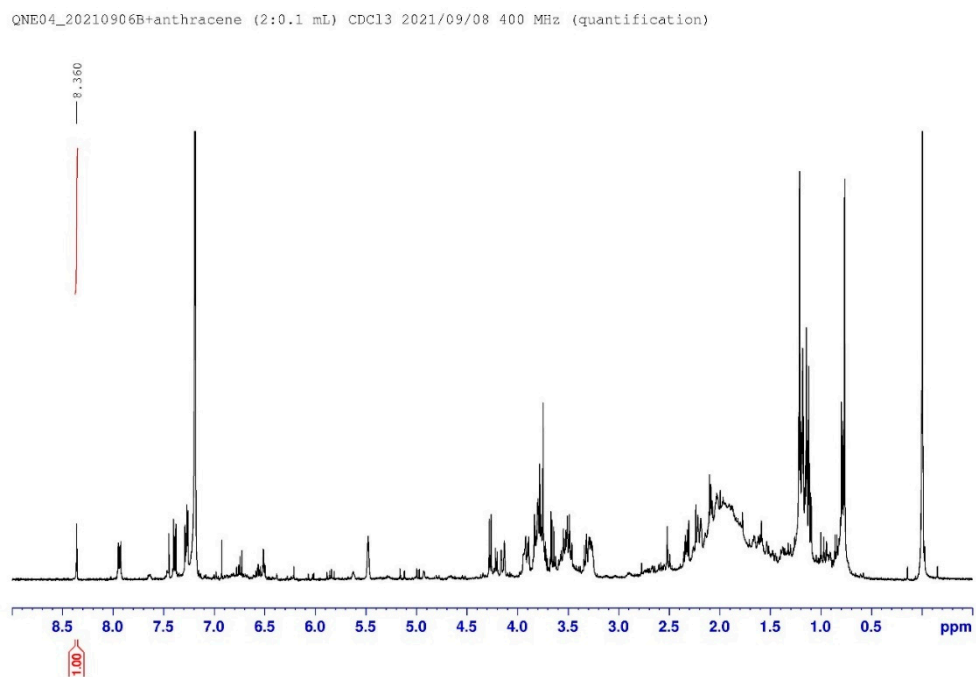

Figure S31.  $^1\text{H}$ -NMR of EP08.

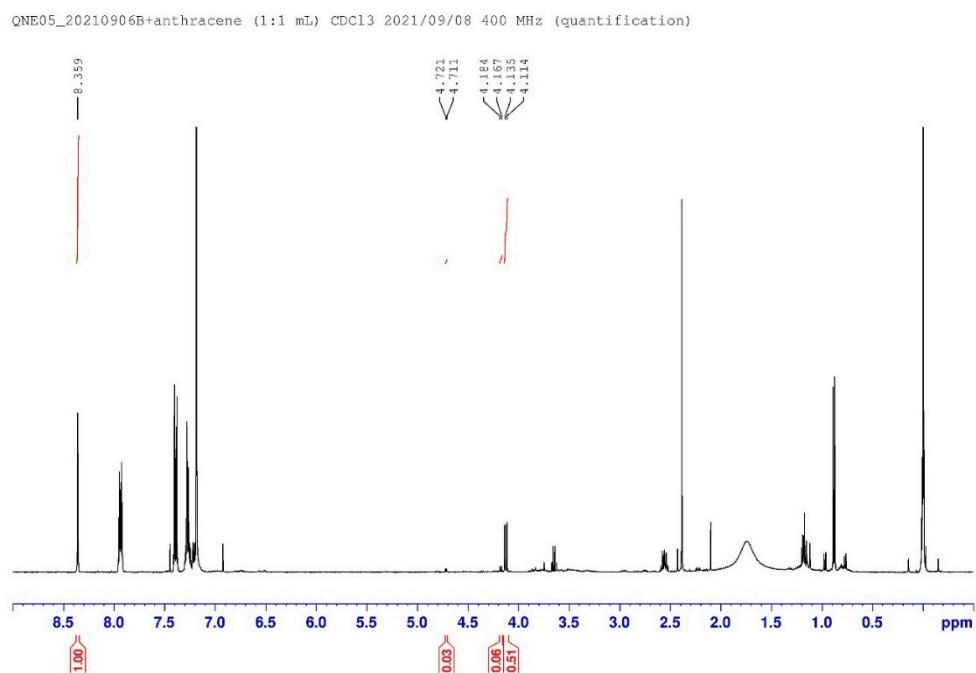

Figure S32.  $^1\text{H}$ -NMR of EP09.

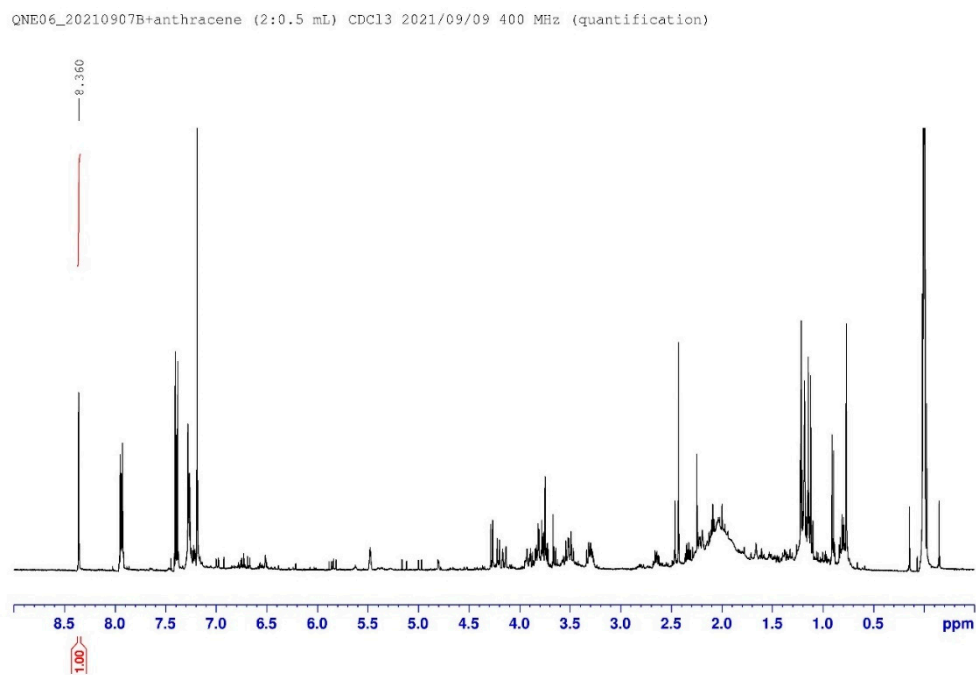

Figure S33.  $^1\text{H}$ -NMR of EP10.

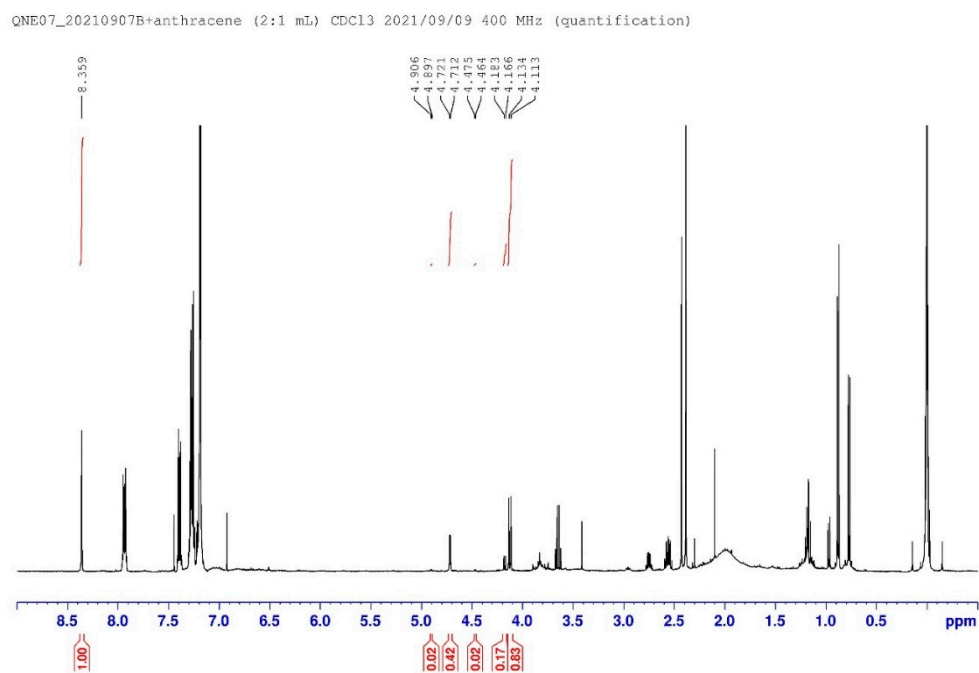

Figure S34.  $^1\text{H}$ -NMR of EP11

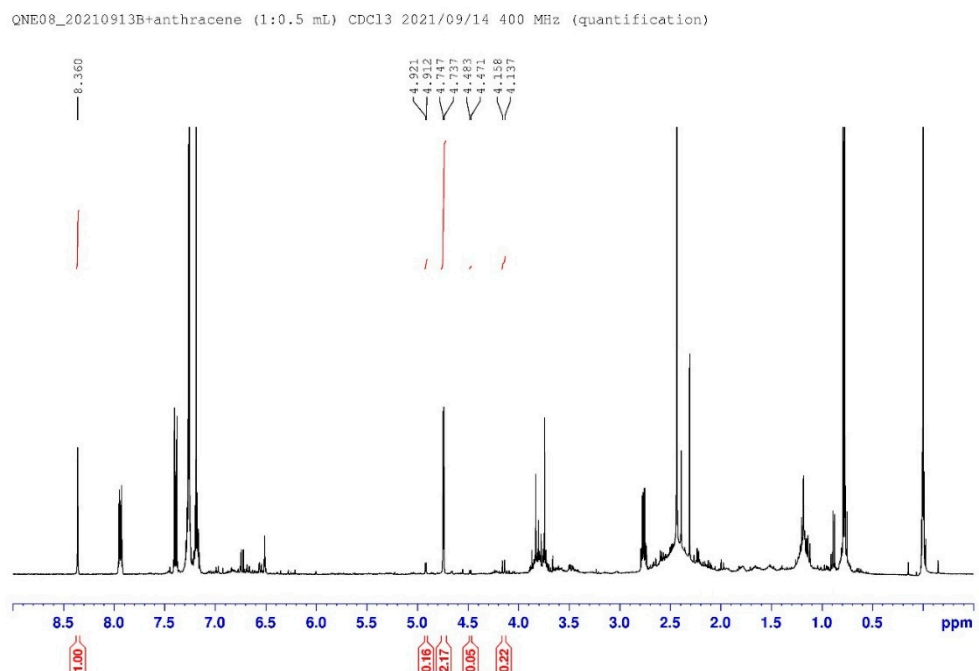

Figure S35.  $^1\text{H}$ -NMR of EP12.

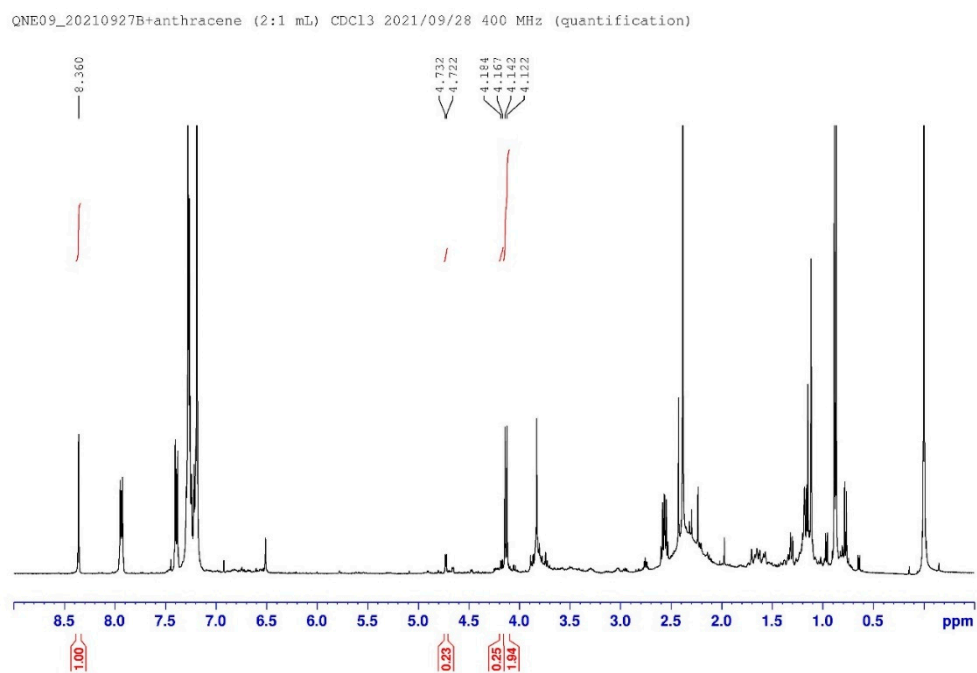

Figure S36.  $^1\text{H}$ -NMR of EP13.

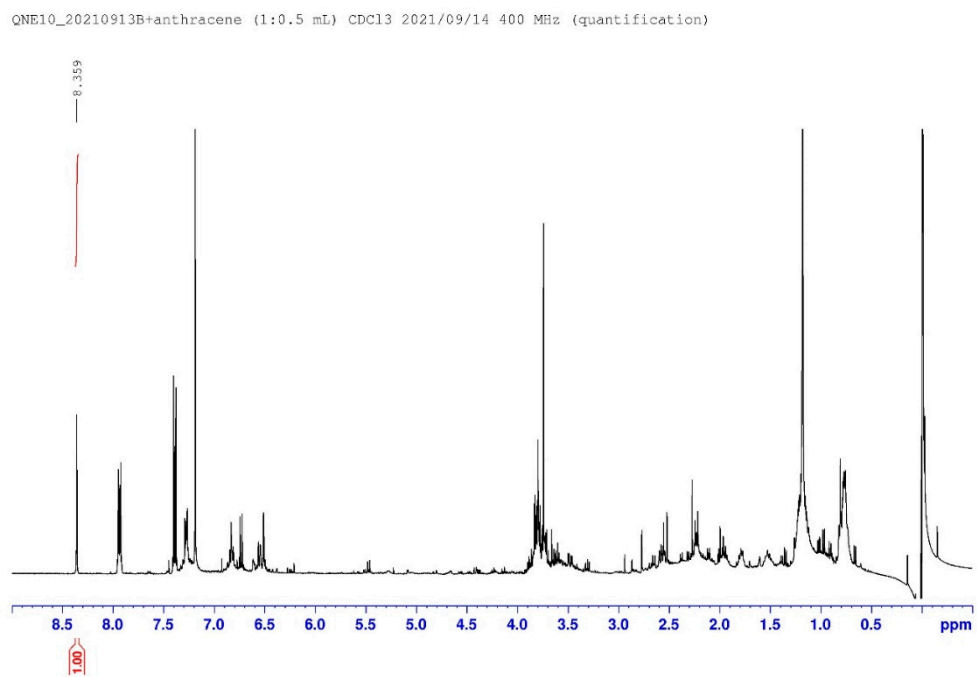

Figure S37.  $^1\text{H}$ -NMR of EP14.

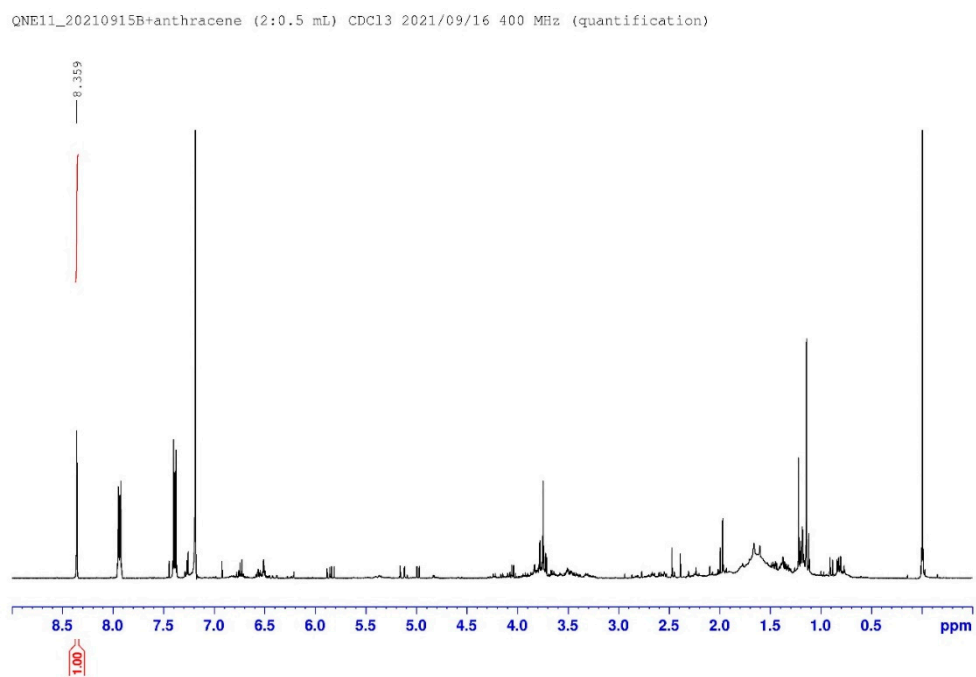

Figure S38.  $^1\text{H}$ -NMR of EP15.

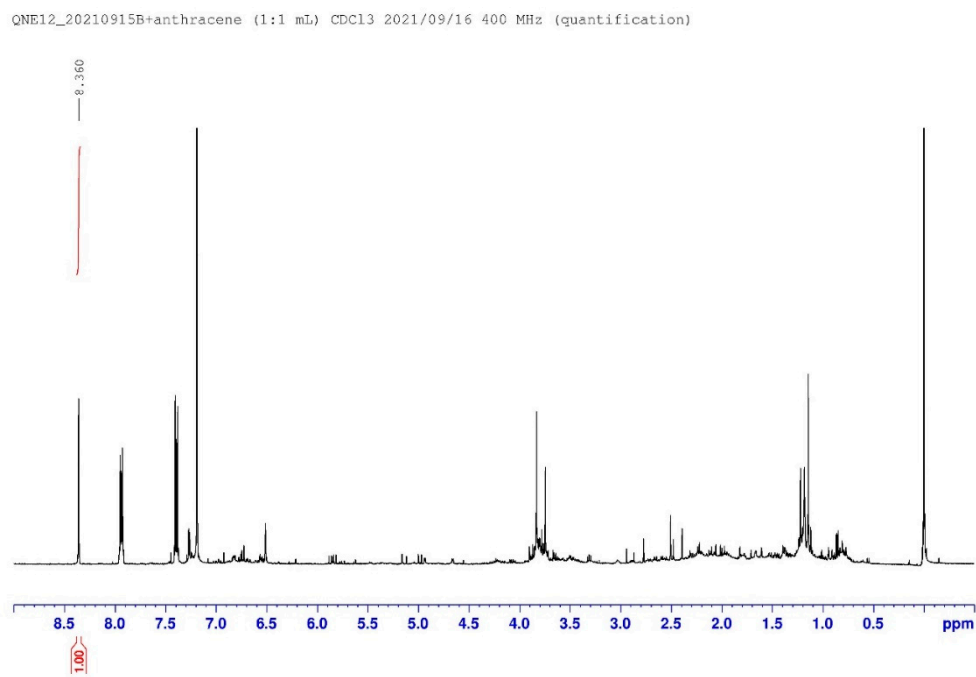

Figure S39.  $^1\text{H}$ -NMR of EP16.

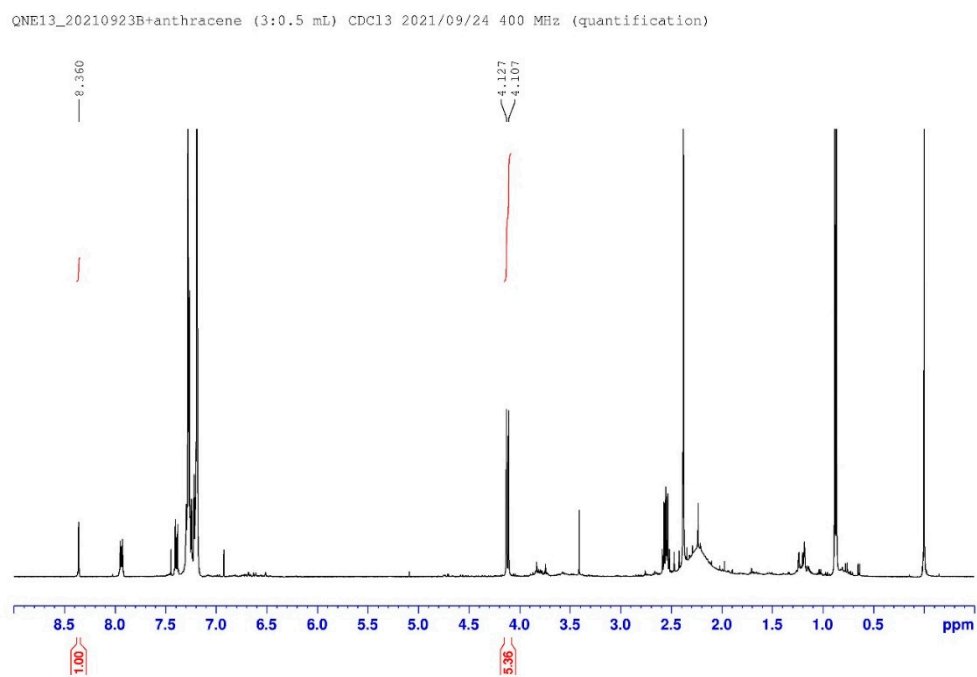

Figure S40.  $^1\text{H}$ -NMR of EP17.

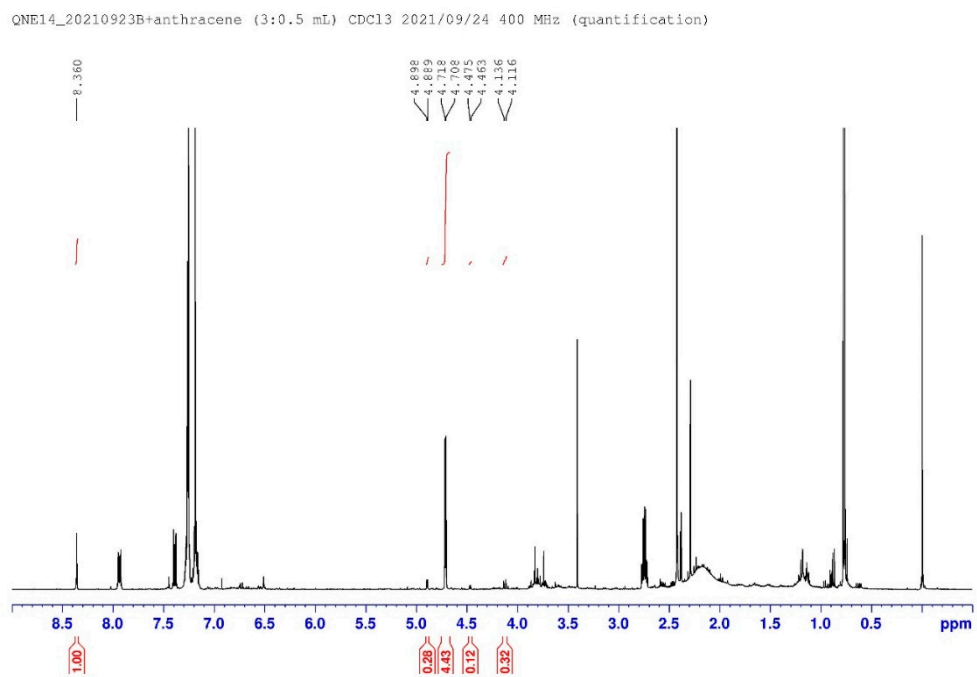

Figure S41.  $^1\text{H}$ -NMR of EP18.

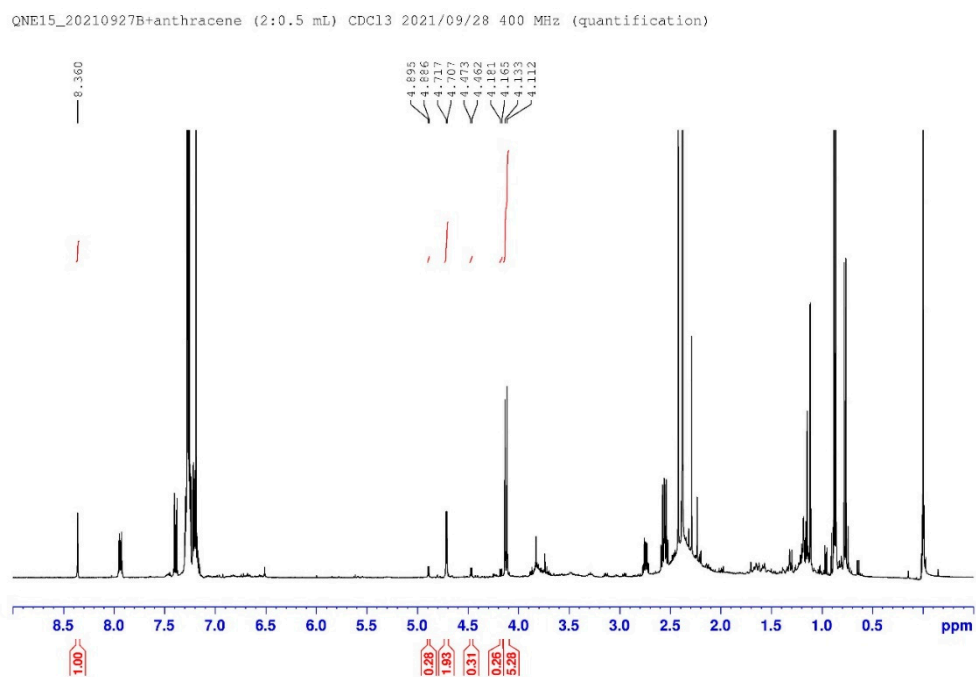

Figure S42.  $^1\text{H}$ -NMR of EP19.

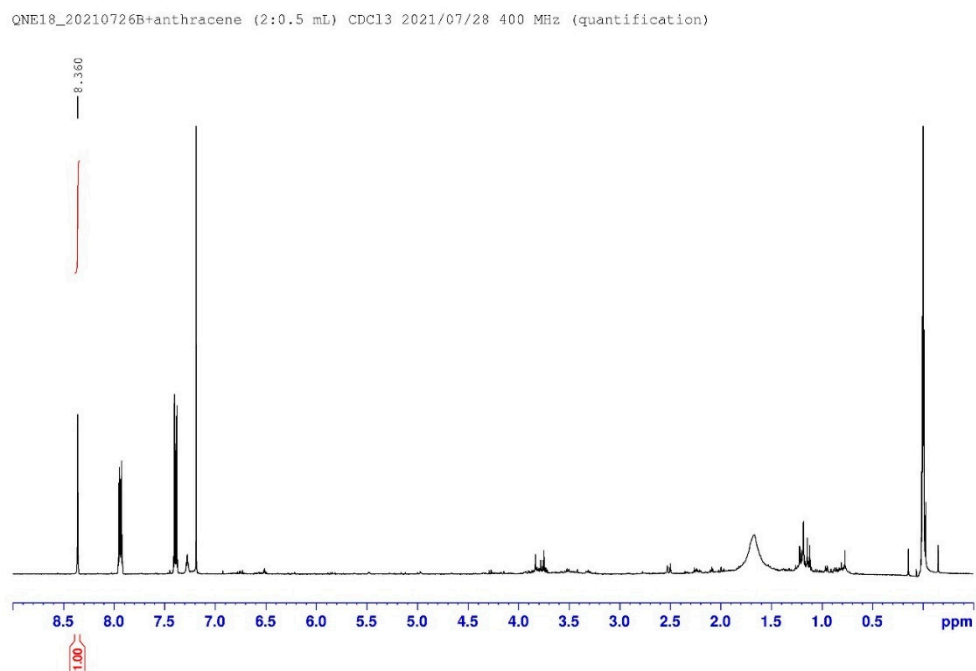



Figure S43.  $^1\text{H}$ -NMR of EP20.

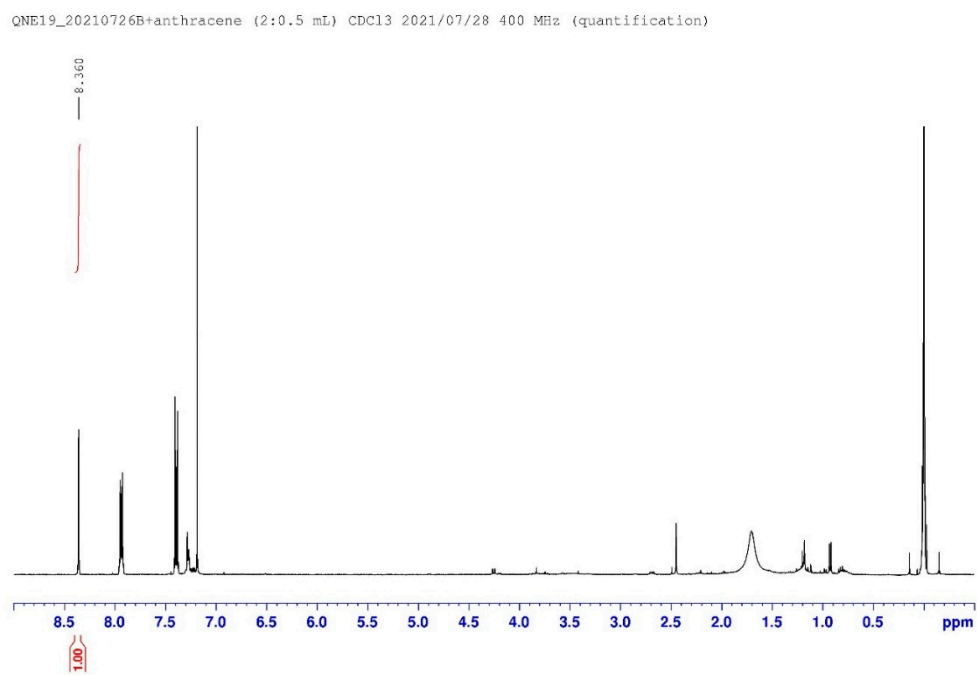

Table S1. Extraction and preparation of Ephedrae Herba for NMR analysis.

|    | Sample | Source                 | Powder (g) | Extract (mg) | Anthracene Standard (mg/10mL) |
|----|--------|------------------------|------------|--------------|-------------------------------|
| 1  | EP01   | <i>E. sinica</i>       | 2.0395     | 27.47        | 5.92                          |
| 2  | EP02   | <i>E. equisetina</i>   | 2.1106     | 12.07        | 5.16                          |
| 3  | EP03   | <i>E. intermedia</i>   | 2.0593     | 12.48        | 5.16                          |
| 4  | EP04   | <i>E. sinica</i>       | 2.0033     | 19.60        | 5.92                          |
| 5  | EP05   | <i>E. sinica</i>       | 2.003      | 31.45        | 6.26                          |
| 6  | EP06   | <i>E. intermedia</i>   | 2.0176     | 8.80         | 6.26                          |
| 7  | EP07   | <i>E. przewalskii</i>  | 2.0051     | 5.91         | 5.49                          |
| 8  | EP08   | <i>E. glauca</i>       | 2.0268     | 19.74        | 5.49                          |
| 9  | EP09   | <i>E. przewalskii</i>  | 2.0003     | 9.93         | 5.49                          |
| 10 | EP10   | <i>E. equisetina</i>   | 2.0118     | 22.39        | 5.49                          |
| 11 | EP11   | <i>E. gerardiana</i>   | 2.0508     | 9.64         | 8.11                          |
| 12 | EP12   | <i>E. intermedia</i>   | 2.239      | 12.07        | 5.62                          |
| 13 | EP13   | <i>E. lepidosperma</i> | 2.0272     | 12.75        | 8.11                          |
| 14 | EP14   | <i>E. minuta</i>       | 2.068      | 6.27         | 8.11                          |
| 15 | EP15   | <i>E. regeliana</i>    | 2.0518     | 3.65         | 8.11                          |
| 16 | EP16   | <i>E. monosperma</i>   | 2.0465     | 13.65        | 5.62                          |
| 17 | EP17   | <i>E. saxatilis</i>    | 2.0928     | 15.66        | 5.62                          |
| 18 | EP18   | <i>E. sinica</i>       | 2.2834     | 15.54        | 5.62                          |
| 19 | EP19   | <i>E. przewalskii</i>  | 1.7584     | 13.40        | 10.96                         |
| 20 | EP20   | <i>E. intermedia</i>   | 0.8773     | 11.37        | 10.96                         |
